# Supplementary figures and images for: Ribosomal scanning on the 5′-untranslated region of the human immunodeficiency virus RNA genome
Source: PubMed Central journal article supplement — Nucleic Acids Res. 2011 Mar 10;39(12):5232–44. doi: 10.1093/nar/gkr113 (PMC3130279; doi:10.1093/nar/gkr113), 2011-03-10

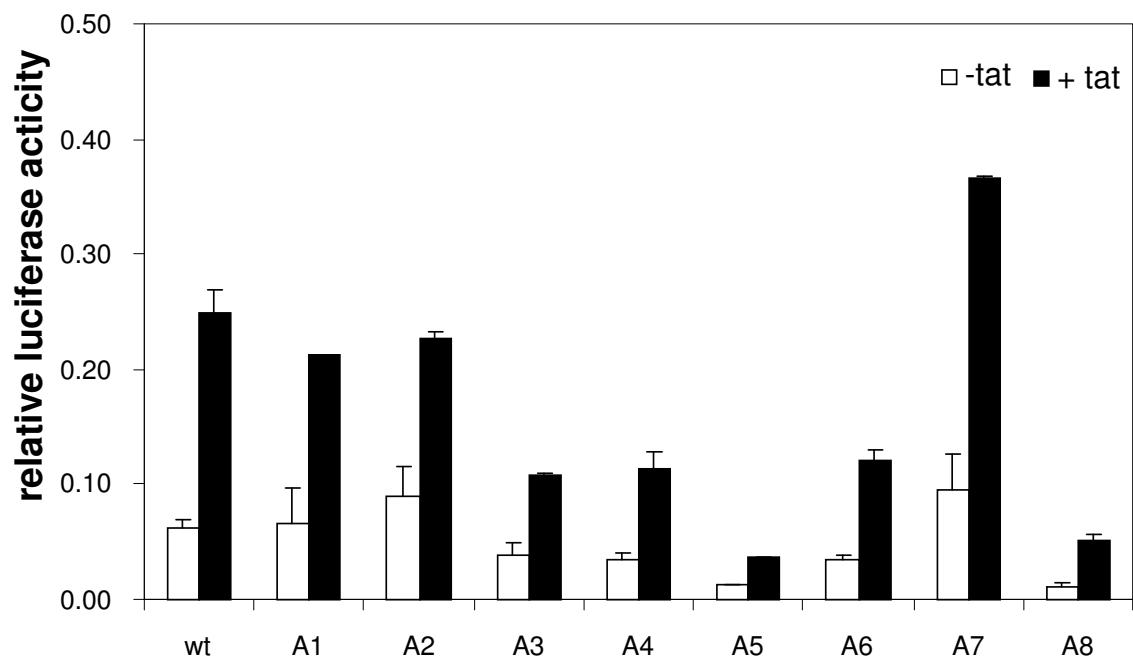

Supplementary Figure 1

A.

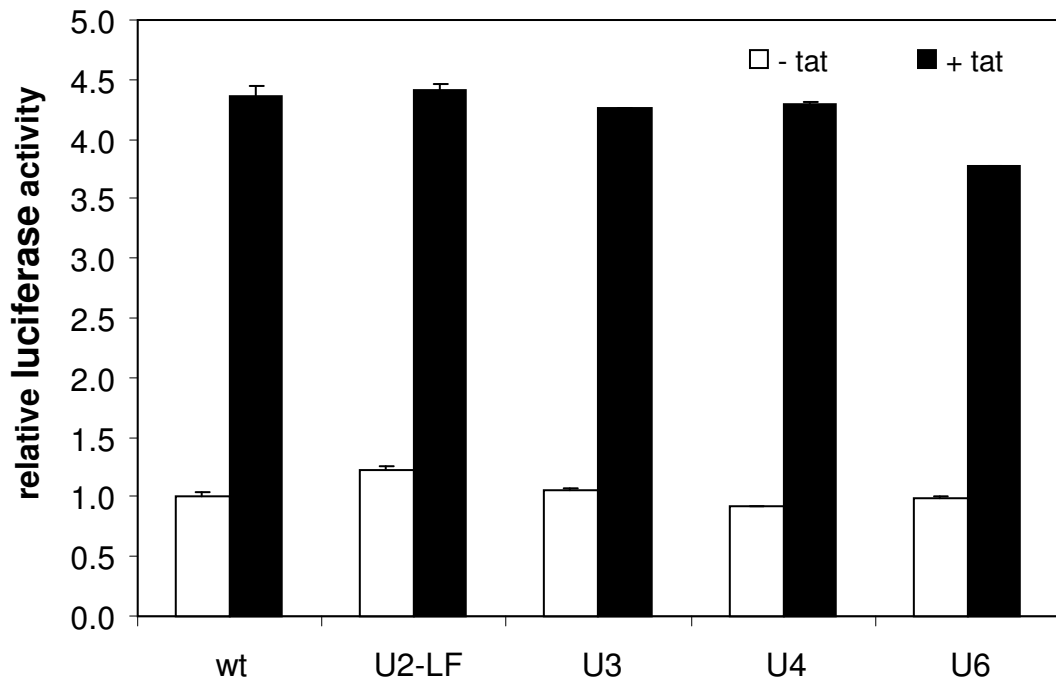

B.

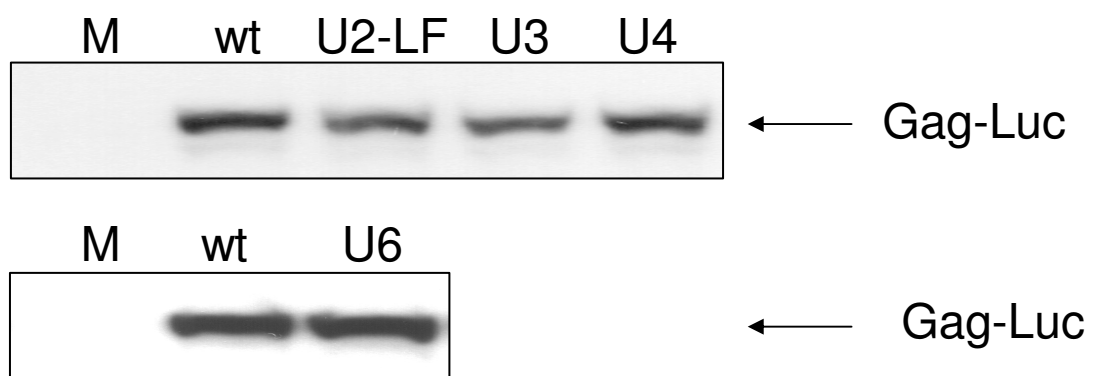

Supplementary Figure 2

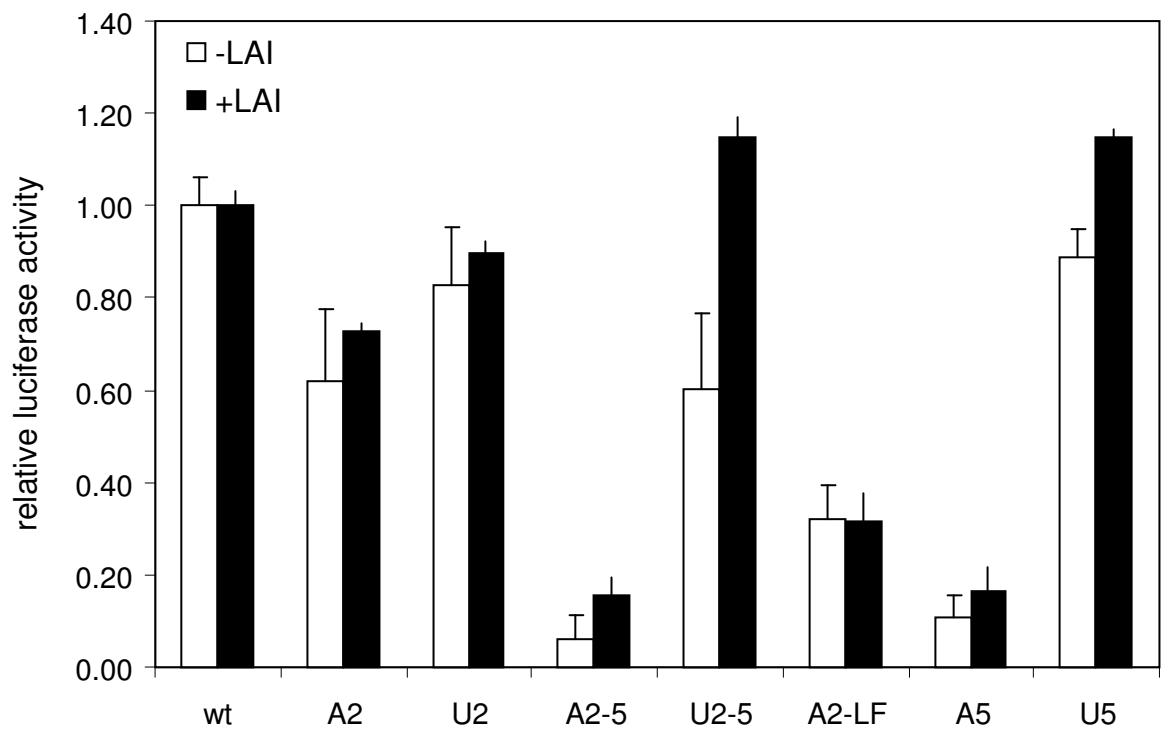

Supplementary Figure 3

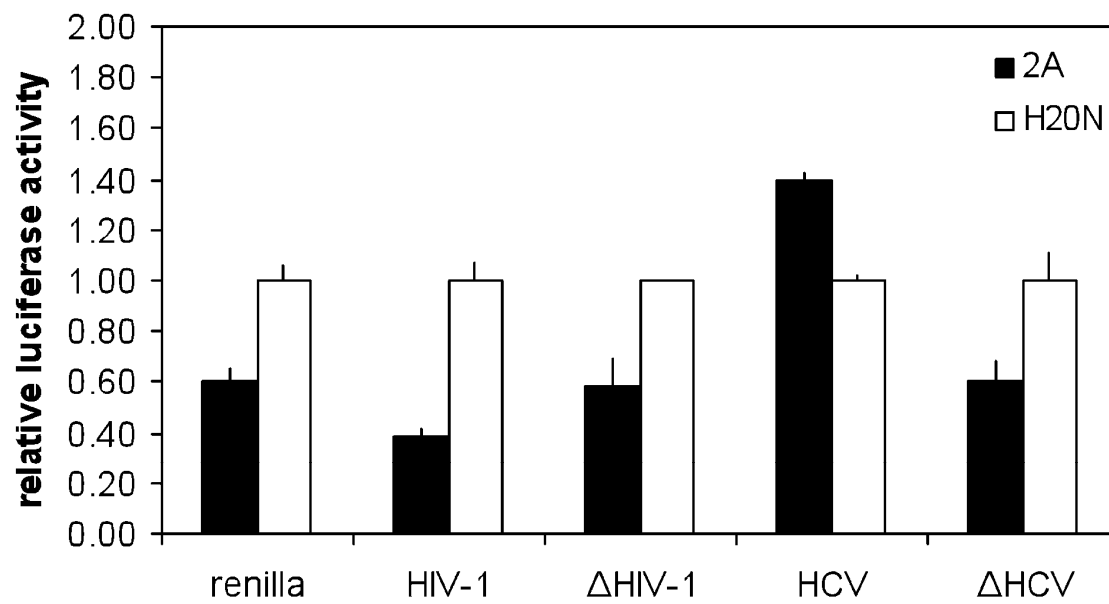

Supplementary Figure 4

Supplement: supp_gkr113_Supplementary_Figures_revised.pdf [file supp_gkr113_Supplementary_Figures_revised.pdf]
